# Supplementary material for: The automatic evaluation of steno-occlusive changes in time-of-flight magnetic resonance angiography of moyamoya patients using a 3D coordinate attention residual network
Source: PubMed Central journal article supplement — Quant Imaging Med Surg. 2022 Dec 12;13(2):1009–22. doi: 10.21037/qims-22-799 (PMC9929428; doi:10.21037/qims-22-799), 2022-12-12
Supplement: qims-13-02-1009-supplementary.pdf [file qims-13-02-1009-supplementary.pdf]

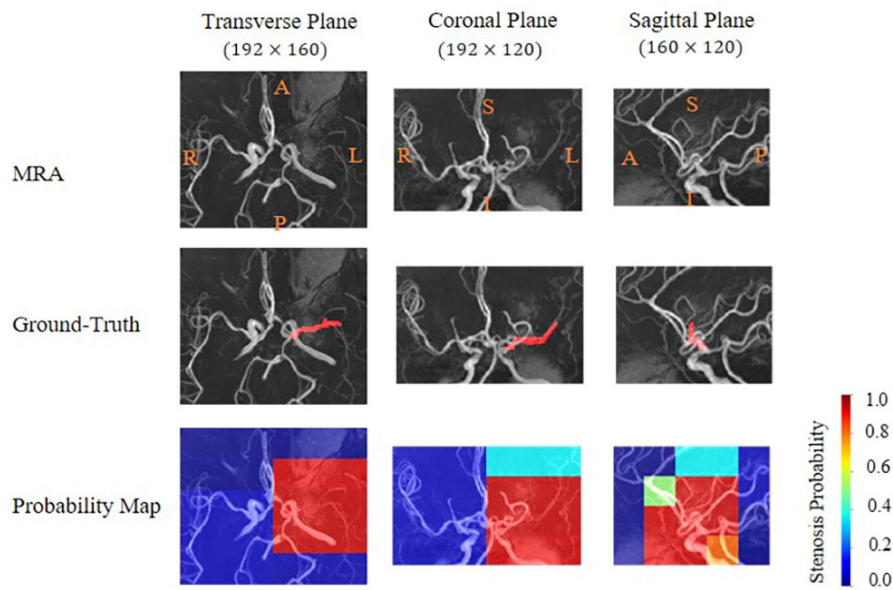

**Figure S1** MRA images in three orthogonal planes of moyamoya disease patients with unilateral stenosis of the MCA. Top: recorded MRA images. Middle: labeled ground-truth corresponding to the MRA images, where the red marking indicates the location of severe stenosis or occlusion. Bottom: predicted probability maps, where the color corresponds to the stenosis probability value as shown by the color bar on the right. L, left; R, right; S, superior; I, inferior; A, anterior; P, posterior; MRA, magnetic resonance angiography; MCA, middle cerebral artery.

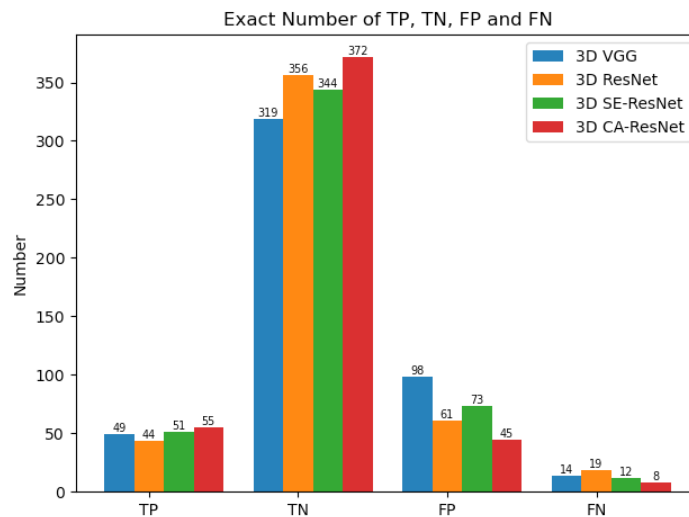

**Figure S2** The bar graph with the exact number of four models. 3D, three-dimensional; VGG, visual geometry group; ResNet, residual network; SE-ResNet, squeeze-and-excitation residual network; CA-ResNet, coordinate attention residual network; TP, true positive; FP, false positive; TN, true negative; FN, false negative.

**Table S1** Evaluation results of 3D CA-ResNet with different patch sizes

| Indicators      | Formula                         | Size 30×32×48 | Size 45×48×72 | Size 60×64×96 |
|-----------------|---------------------------------|---------------|---------------|---------------|
| Sensitivity/TPR | $TP/(TP + FN)$                  | 82.97%        | 79.54%        | 87.30%        |
| Specificity     | $TN/(TN + FP)$                  | 74.58%        | 83.68%        | 89.21%        |
| Accuracy        | $(TP + TN)/(TP + FN + TN + FP)$ | 74.86%        | 83.18%        | 88.96%        |
| Precision/PPV   | $TP/(TP + FP)$                  | 9.87%         | 40.23%        | 55.00%        |
| NPV             | $TN/(TN + FN)$                  | 99.24%        | 96.73%        | 97.89%        |
| AUC             | –                               | 0.8575        | 0.8911        | 0.9439        |

AUC, area under the receiver operating characteristic curve; 3D CA-ResNet, three-dimensional coordinate attention residual network; TPR, true positive rate; TP, true positive; FP, false positive; TN, true negative; FN, false negative; PPV, positive predictive value; NPV, negative predictive value.
